# 1 Common pediatric surgical conditions and associated health-seeking 2 behaviors in Pakistan: an urban and rural comparative assessment

3 **Authors:** Saqib Hamid Qazi <sup>1</sup>, Syed Saqlain Ali Meerza<sup>2</sup>, Sohail Asghar Dogar<sup>1</sup>, Zahra Ali Padhani<sup>3</sup>,  
4 Mushtaq Mirani<sup>2</sup>, Muhammad Khan Jamali<sup>2</sup>, Sohail Lakhani<sup>2</sup>, Sajid Muhammad<sup>4</sup>, Muhammad Anwar<sup>5</sup>,  
5 Saleem Islam<sup>1</sup>, Sadaf Khan<sup>6</sup>, Anjum Abbas<sup>2</sup>, Zahid Ali Khan<sup>2</sup>, Sana Khatoon<sup>2</sup>, Imtiaz Sheikh<sup>2</sup>, Rasool  
6 Bux<sup>4</sup>, Rafey Ali<sup>4</sup>, Hassan Naqvi<sup>4</sup>, Arjumand Rizvi<sup>4</sup>, Imran Ahmed Chahudary<sup>4</sup>, Rizwan Haroon Ur  
7 Rashid<sup>7</sup>, Syed Akbar Abbas<sup>8</sup>, Abdul Sami Memon<sup>9</sup>, Sadia Tabassum<sup>10</sup>, Zara Bhatti<sup>1</sup>, Abdur Rehman<sup>2</sup>,  
8 Sajid Soofi<sup>4</sup>, Jai K Das<sup>2,11</sup>

## 9 Affiliations:

10  
11 <sup>1</sup> Section of Pediatric Surgery, Department of Surgery, Aga Khan University, Karachi, Pakistan

12 <sup>2</sup> Institute for Global Health and Development, Aga Khan University, Karachi, Pakistan

13 <sup>3</sup> University of Adelaide, Australia

14 <sup>4</sup> Center of Excellence in Women and Child Health, Aga Khan University, Karachi, Pakistan

15 <sup>5</sup> National Institute of Child Health, Karachi

16 <sup>6</sup> Section of General Surgery, Department of Surgery, Aga Khan University, Karachi, Pakistan

17 <sup>7</sup> Section of Orthopedic Surgery, Department of Surgery, Aga Khan University, Karachi, Pakistan

18 <sup>8</sup> Section of Otolaryngology & Head & Neck Surgery, Department of Surgery, Aga Khan University,  
19 Karachi, Pakistan

20 <sup>9</sup> Department of Ophthalmology, Aga Khan University, Karachi, Pakistan

21 <sup>10</sup> Section of Dermatology, Department of Medicine, Aga Khan University, Pakistan

22 <sup>11</sup> Department of Paediatrics and Child Health, Aga Khan University.

23 **Address correspondence to:** Dr. Jai K. Das (\*), Assistant Director, Institute for Global Health and  
24 Development, Aga Khan University, Karachi, Pakistan. [jai.das@aku.edu](mailto:jai.das@aku.edu).

25

26

27

28

29 **Abstract**

30 Approximately five billion people do not have access to necessary surgical treatment globally and  
31 up to 85% of children in LMICs are affected with conditions requiring surgical care by the age of  
32 15 years. It is crucial to identify common surgical conditions in children in Pakistan to inform  
33 healthcare professionals and policymakers for effective resource allocation. This is a  
34 representative cross-sectional household survey conducted on children aged 5-10 years. It is to  
35 assess existing surgical diseases and healthcare-seeking behaviors in the two largest provinces  
36 (Sindh and Punjab) of Pakistan. Data was collected through a validated cross-sectional survey tool  
37 [Surgeons OverSeas Assessment of Surgical Need (SOSAS)]. Caregivers were asked about their  
38 child's recent and past surgical conditions in six distinct anatomical regions and pictures were  
39 taken of identified conditions after appropriate consent for further diagnosis. Health-seeking  
40 behaviors including the kind of treatment sought, the nature of care received, and the reasons for  
41 not receiving care were noted. The study found that 13.5% of children with a surgical condition,  
42 had similar distribution across the urban (13.2%) and rural (13.7) areas. The greatest number of  
43 surgical conditions were found to be on the head and neck region (57.7%), while the back  
44 accounted for the least number of conditions (1.7%). Our results outline a need for organizing all  
45 entities (governmental, non-governmental, and private) involved in child health to ensure efficient  
46 resource allocation to cater to existing surgical problems.

47

48

49

50

51

## 52 **Introduction**

53 Conditions requiring surgical care are responsible for at least 11% of the overall global disease  
54 burden [1]. An estimated five billion people do not have access to basic surgical care, which makes  
55 the prevalence of surgical conditions in low- and middle-income countries (LMICs) particularly  
56 noteworthy [2]. In South Asia, more than 95% of the population lacks adequate access to medical  
57 care for conditions that require management through procedures [3]. Even more notable is the high  
58 surgical disease density in children, with 85% of children in LMIC's having conditions requiring  
59 surgical care by the age of 15 years [4]. Many of these conditions manifest during the formative  
60 years of childhood, hence carry the possibility of lifelong disability or an increased risk of  
61 mortality [5] if not managed correctly in time.

62 In LMICs, where children make up nearly half of the overall population, there is relatively low  
63 attention paid to surgical conditions as the focus remains on malnutrition, infectious diseases and  
64 newborn care [6]. According to the United Nations, to attain the Sustainable Development Goals  
65 (SDGs) which include “health system strengthening and universal health coverage”, it is essential  
66 to have access to appropriate healthcare [7]. The infrastructure, personnel, and resources necessary  
67 for pediatric surgical care are distinct from those required for adults [8]. As a crucial aspect of  
68 healthcare in LMICs, the enhancement of surgical healthcare provision for children is currently  
69 under focus [9] and this carries great socioeconomic benefit, as unresolved surgical issues  
70 potentiate medical expenses, incapacity, and loss of productivity. Therefore, techniques for  
71 improving the standard of pediatric surgical care in low socio-economic areas can significantly  
72 lower childhood mortality and morbidity and decrease the associated psychosocial and financial  
73 stress [2] [10]. To achieve this goal, it is crucial to accurately identify the existing common

74 pediatric surgical conditions, that can assist healthcare professionals and policymakers in efficient  
75 allocation of budget, skilled personnel, and equipment.

76 A small scale study in rural Pakistan has shown a high demand for pediatric surgical care, with a  
77 staggering 14.3% unmet operative need [11], thus highlighting the importance for a larger scale  
78 assessment. According to the World Bank, Pakistan, an LMIC in South Asia, is amongst the five  
79 most populous countries in the world [12] and children below the age of 18 years account for more  
80 than 45% of the population [13]. There are small scale studies that describe pediatric surgical crises  
81 in Pakistan, however, a large scale population representative study had yet to be conducted to  
82 gauge Pakistan's common pediatric surgical conditions and their distribution [14] [15] in a  
83 systematic manner. This study aims to evaluate the prevalence of pediatric surgical conditions in  
84 school age children and comprehend the health-seeking patterns in rural and urban areas of the  
85 Punjab and Sindh provinces of Pakistan.

## 86 **METHODOLOGY**

### 87 **Study design**

88 This is a cross sectional household survey conducted on a population of children between the ages  
89 of 5-10 years, with the aim to outline the distribution of common surgical conditions and  
90 understanding the existing health seeking behavior.

### 91 **Study setting**

92 The survey was carried out in the two largest provinces of Pakistan, Sindh and Punjab, which  
93 comprised more than two-thirds of Pakistan's population, in the year 2020-21. Punjab is the most  
94 densely populated province in Pakistan with a population of over 110 million [16] followed by  
95 Sindh with a population of approximately 47.9 million [17].

## 96 **Sample Size and Sampling strategy**

97 The study was part of a larger survey focusing on the overall health and nutrition of school age  
98 children (5-10 years of age). The sample size was estimated assuming the response rate of 90%,  
99 95% confidence interval, 7% precision, 1.5% design effect, and the total minimum sample size  
100 required was 2055 individuals in Sindh and 3582 in Punjab. We took the Pakistan Bureau of  
101 Statistics framework and randomly selected enumeration blocks (clusters) from both the urban and  
102 rural areas (population proportionate), which were termed Primary Sampling Units (PSUs).  
103 Multistage sampling was done to select enumeration blocks and 20 households were randomly  
104 selected (Secondary Sampling Units) from each cluster. Households that refused to participate  
105 were replaced with the next house in the randomization process.

106

## 107 **Survey Tool**

108 Data was collected through a validated cross-sectional survey tool [Surgeons OverSeas  
109 Assessment of Surgical Need (SOSAS)]. SOSAS has evolved into a validated population-based  
110 household survey which evaluates the prevalence of conditions requiring surgical treatment [18]  
111 [19]. The SOSAS questionnaire is divided into two specific components; the first component  
112 focuses on demographic information and includes the age and gender of all the residents in a  
113 household (household members were defined as people living in the same residence) and the  
114 second component focuses on children's recent and past surgical conditions in six distinct  
115 anatomical regions: head, eyes, face, ears and neck; chest; back; abdomen; groin, genitals, and  
116 buttocks; arms, hands, legs, and feet. The nature of surgical condition whether acquired (example:  
117 wounds, hernia, renal stones, and bleeding per penis/rectum) or congenital (example: congenital

118 cardiac and eye problems) and health seeking behaviors, including the kind of treatment sought,  
119 the nature of care received, and the reasons for not accessing or receiving care were all noted.

## 120 **Data collection**

121 The survey was conducted in two rounds. Round one in Sindh was between (5th to 22nd March  
122 2020) and round two was from (1st June - 17th July 2020). In Punjab round one was between (27th  
123 February-22nd March 2020) and round two from (19th September to 22nd October 2020). Data  
124 was collected from all the six divisions and 27 districts in Sindh, and all the nine divisions and 36  
125 districts in Punjab. Households were line-listed and a total of 5,677 (rural: 3,531 and urban: 2,146)  
126 eligible houses were randomized (**Table 1**). The survey was conducted by research personnel who  
127 were trained for data collection and were monitored by senior research personnel. A pilot study  
128 for initial assessment and improvements was conducted in 50 households. Information was  
129 recorded electronically via an application developed specially for this survey by the Data  
130 Management Unit (DMU). The application was developed for Android, and an IIS-10 webserver  
131 was set up with MySQL database to collect data in remote areas. The application was used on  
132 Samsung tab A7 tablet. To restrict inappropriate access to the application, authorized data  
133 collectors were required to authenticate using login credentials that were specifically generated for  
134 the use of this application on the server. Along with the survey, a set of 736 pictures were taken of  
135 surgical conditions, from a total of 1,536 (47.9%), after obtaining written informed consent from  
136 patients and caregivers. These pictures were shared with the relevant doctors at the Aga Khan  
137 University Hospital (AKUH) for further diagnosis, and reconfirmation. Pictures were taken  
138 through the same application and stored on the server under password protection.

## 139 **Data Analysis**

140 Surgical conditions in children, either present at the time of the survey or in the past were noted as  
141 conditions requiring surgical care. Unmet surgical need was defined as a surgical condition that  
142 requires active surgical care, for which the child did not access or receive surgical care. Sampling  
143 weights were added to the data at household and individual level, to account for unequal selection  
144 probabilities and non-response. A standard survey module was used to consider the multi-stage survey  
145 design including stratification, clustering, and sampling weights. Descriptive statistics for the subjects were  
146 estimated and reported as mean ( $\pm$ SD), median, ranges and frequencies as appropriate. The analyses  
147 estimated results at district level with population subgroups such as age, gender, school status (in-school or  
148 out-of-school) and geographical location (urban or rural), and districts of the region. Descriptive analysis  
149 was performed using STATA 16 (Stata Statistical Software: Release 16. College Station, TX:  
150 StataCorp LP) [20]. Chi squared tests were performed to determine the association between a child's  
151 school attendance and socioeconomic status of the family, and the nature of surgical condition. A p-value  
152 of less than 0.05 was considered statistically significant to conclude an association.

## 153 **Ethics Statement**

154 Ethical approval was granted by the Ethics Review Committee (ERC) of the Aga Khan University  
155 and the National Bioethics Committee (NBC). At every stage of the data handling process,  
156 protecting the privacy of all gathered information was ensured and every interview was conducted  
157 in a confidential setting and encrypted data was secured in password protected central database.  
158 The research participants were informed about the purpose, methods and benefits and intended use  
159 of the research. Informed consent was obtained from the parent/guardian of each participant under  
160 18 years of age. Respondents were free to stop interview at any time or skip any questions they

161 did not want to answer. They had the right to ask questions at any point before, during or after the  
162 interview. All interviews were conducted by trained staff and in conditions of privacy.

## 163 **RESULTS**

### 164 **Demographics**

165 Of the 5,677 households, we surveyed a total of 8,026 children, of which 935 children were  
166 noted to have surgical conditions that required attention. (**Table 1**).

### 167 **Surgical conditions identified**

#### 168 *Lesions*

169 A total of 585 (11.5%) children in rural, and 350 (11.9%) children in urban areas were identified  
170 to have a total of 1,536 surgical conditions. A few children were found to have more than one type  
171 of surgical condition. An overview of the surgical conditions noted is presented in **Table 1**. From  
172 the total identified conditions, pictures were taken of 736, after appropriate consent, for further  
173 diagnosis and review. Majority of the pictures were of conditions on the head and neck region (n  
174 = 328, 44.6%). More information on lesion pictures can be found in **S1 Table**.

175 Through a head-to-toe survey via the SOSAS tool, the head and neck region (comprising of the  
176 head, eye, ear, face, and neck) was found to be the most frequently affected region in both rural  
177 (54.3%) and urban (65.9%) areas. The common conditions noted were mostly wounds secondary  
178 to trauma. **Table 2a**.

179 **Table 1: Details of children with lesions**

|                                                | <b>Rural</b>  | <b>Urban</b>  |
|------------------------------------------------|---------------|---------------|
| Clusters in Sindh                              | 51            | 57            |
| Clusters in Punjab                             | 123           | 67            |
| Total households                               | 3531          | 2146          |
| Total number of children                       | 5,073 (63.2%) | 2,953 (36.8%) |
| Total number of children with surgical lesions | 585 (11.5%)   | 350 (11.9%)   |



180

|                                  |             |               |               |
|----------------------------------|-------------|---------------|---------------|
| Total number of surgical lesions |             | 1,020 (66.4%) | 516 (33.6%)   |
| Socioeconomic status of family   | High income | 222 (38.1%)   | 265 (75.9%)   |
|                                  | Low income  | 362 (62%)     | 84 (24.1%)    |
| School attendance                | Yes         | 454 (77.7%)   | 302 (86.5%)   |
|                                  | No          | 130 (22.3%)   | 47 (13.5%)    |
| Age                              | 5 years     | 166 (16.3%)   | 82 (15.9%)    |
|                                  | 6 years     | 238 (23.4%)   | 115 (22.3%)   |
|                                  | 7 years     | 212 (20.8%)   | 124 (24.0%)   |
|                                  | 8 years     | 218 (21.4%)   | 106 (20.5%)   |
|                                  | 9 years     | 185 (18.2%)   | 89 (17.2%)    |
| Gender of the child              | Male        | 2,616 (51.6%) | 1,503 (50.9%) |
|                                  | Female      | 2,457 (48.4%) | 1,450 (49.1%) |

181

182 *Head and neck*

183 A sum of 886 surgical conditions were identified in this region. The most affected area was the  
 184 face (27.7%), followed by the head (25.8%), ears (20.9%), eyes (20.9%), and neck (4.7%).  
 185 Conditions noted on the head, eyes and face were mostly secondary to trauma, while conditions  
 186 on ears and neck were consistent with acquired conditions such as mass or growth or congenital  
 187 deformities.

188 A total of 328 pictures were taken of the surgical conditions from this region, which identified  
 189 scars/keloids (n = 76) and scarring alopecia (n = 47) as the most common conditions on the head,  
 190 and post-traumatic disfiguring scars (n = 42) as most common condition of the face. Growths,  
 191 comprising of hemangiomas (n = 4) and mass/cyst/swellings (n = 4), were the most common  
 192 conditions on the neck as diagnosed through pictures. Percentage of surgical conditions on the  
 193 head and neck region for which no surgical care was sought was found to be 6.7% in rural areas,  
 194 and 11.7% in urban settings. **(Table 2a).**

195

196

**Table 2a: Lesions on head and neck**

| Region | Eyes (n = 185) | Ears (n = 185) | Face (n = 245) | Head (n = 229) | Neck (n = 42) |
|--------|----------------|----------------|----------------|----------------|---------------|
|--------|----------------|----------------|----------------|----------------|---------------|

| Surgical problem              | Lesions n (%) |              | Lesions n (%) |              | Lesions n (%) |               | Lesions n (%) |              | Lesions n (%) |              |
|-------------------------------|---------------|--------------|---------------|--------------|---------------|---------------|---------------|--------------|---------------|--------------|
|                               | Urban         | Rural        | Urban         | Rural        | Urban         | Rural         | Urban         | Rural        | Urban         | Rural        |
| Wound (Secondary to accident) | 10<br>(12.6)  | 30<br>(28)   | 4 (7.0)       | 8 (4.8)      | 75<br>(75.8)  | 117<br>(76.5) | 65<br>(64.4)  | 89<br>(60.0) | 1 (9.6)       | 2<br>(4.4)   |
| Wound (Others)                | 13<br>(20.8)  | 18<br>(12.6) | 41<br>(64.6)  | 74<br>(58.5) | 7<br>(11.4)   | 20<br>(15.3)  | 9<br>(15.9)   | 29<br>(23.3) | 2 (9.4)       | 9<br>(30.0)  |
| Burn                          | 1 (0.8)       | 4<br>(4.1)   | 1 (0.8)       | 0 0          | 2 (2.3)       | 2<br>(1.2)    | 2 (1.9)       | 1<br>(0.7)   | 2<br>(13.9)   | 1<br>(5.6)   |
| Mass or growth (Solid)        | 5 (5.6)       | 5<br>(4.2)   | 2 (2.7)       | 3 (2.2)      | 1 (0.6)       | 1<br>(0.9)    | 4 (3.3)       | 9<br>(9.6)   | 4<br>(33.3)   | 12<br>(48.0) |
| Deformity congenital          | 16<br>(20.4)  | 29<br>(24)   | 13<br>(21.2)  | 19<br>(14.9) | 5 (5.7)       | 5<br>(2.5)    | 1 (0.7)       | 2<br>(1.3)   | 4<br>(28.6)   | 3<br>(10.2)  |
| Deformity acquired            | 2 (2.7)       | 3<br>(3.0)   | 1 (2.5)       | 7 (9.5)      | 3 (4.2)       | 7<br>(3.7)    | 11<br>(13.8)  | 7<br>(5.1)   | 1 (5.4)       | 1<br>(1.8)   |
| Blindness                     | 0 (0)         | 1<br>(0.8)   | N/A           | N/A          | N/A           | N/A           | N/A           | N/A          | N/A           | N/A          |
| Reduced Vision                | 23<br>(37.1)  | 25<br>(23.5) | N/A           | N/A          | N/A           | N/A           | N/A           | N/A          | N/A           | N/A          |
| Hearing loss                  | N/A           | N/A          | 1 (1.3)       | 11<br>(10.1) | N/A           | N/A           | N/A           | N/A          | N/A           | N/A          |

197 (The percentages in the table below are a result of a weighted analysis)

198 *Chest*

199 A total of 48 conditions requiring surgical attention were noted on this region, majority of the  
200 conditions in rural areas were secondary to traumatic injury (20.4%), closely followed by non-  
201 injury-related wounds (19.8%), such as congenital deformities, more details in **Table 2b**. Falls  
202 were identified as one of the main reasons leading to traumatic surgical conditions in both urban  
203 (81.3%) and rural (75.8%) areas.

204 A total of 11 pictures were taken of the conditions on the chest which identified pectus excavatum  
205 (n = 5) and lymphangioma (n = 3) as the most commonly present conditions.

206 *Back*

207 We identified 26 conditions on the back, of which majority consisted of non- traumatic lesions,  
208 such as congenital deformities and acquired mass or growths, more details in **Table 2b**.

209 The 12 pictures obtained highlighted hemangiomas (n = 4) and other soft tissue swelling (n = 2)  
210 as common conditions of the back that required surgical evaluation. In urban localities, burn injury  
211 (25.3%) was found as the most common condition. The survey identified a high percentage of  
212 population that did not receive surgical care for conditions on the back, amounting to 14.5% in  
213 rural and 38.6% in urban areas.

#### 214 *Abdomen*

215 Of the 106 surgical conditions noted in the abdomen, most consisted of abdominal distention with  
216 pain and children's inability to urinate appropriately, more details in **Table 2b**.

217 A set of 40 lesion pictures taken identified abdominal hernia (n = 22) as the most common surgical  
218 condition of the abdomen. Most wounds secondary to trauma resulted from burns, in both urban  
219 (50.8%) and rural (48.4%) areas.

#### 220 *Buttocks/ Groin/ Genitalia*

221 Among a total of 49 surgical conditions identified in this region, most consisted of non- traumatic  
222 lesions, in both urban and rural areas. Congenital deformities and mass/swellings were also  
223 noteworthy conditions noted that required a surgeon's evaluation (**Table 2b**).

224 A total of 19 pictures were taken of the surgical conditions on buttock/groin/genitalia, which  
225 identified inguinal hernia (n = 7) and gluteal abscesses (n = 6) as common conditions. Of the  
226 wounds secondary to trauma, falls were noted as the most common cause in both urban (48.8%)  
227 and rural (72.5%) areas.

228

229

**Table 2b: Lesions on chest, back, abdomen, buttocks/groin/genitalia**

| Region                        | Chest (n = 48) |          | Back (n = 26) |          | Abdomen (n = 106) |           | Buttocks/Groin/Genitalia (n = 49) |           |
|-------------------------------|----------------|----------|---------------|----------|-------------------|-----------|-----------------------------------|-----------|
| Surgical problem              | Lesions (%)    |          | Lesions (%)   |          | Lesions (%)       |           | Lesions (%)                       |           |
|                               | Urban          | Rural    | Urban         | Rural    | Urban             | Rural     | Urban                             | Rural     |
| Wound (Secondary to accident) | 2 (14.4)       | 7 (20.4) | 0 (0)         | 4 (19.5) | 1 (3.0)           | 3 (3.1)   | 1 (5.3)                           | 1 (2.7)   |
| Wound (Other)                 | 3 (12.1)       | 6 (19.8) | 2 (38.6)      | 7 (39)   | 3 (8.6)           | 4 (7.2)   | 4 (20.1)                          | 12 (29.2) |
| Burn                          | 1 (3.3)        | 1 (3.0)  | 2 (25.3)      | 1 (2.7)  | 2 (11.3)          | 5 (7.1)   | 0 (0)                             | 2 (9)     |
| Mass or growth (Solid)        | 3 (18.1)       | 0 (0)    | 1 (15.7)      | 3 (11.8) | 1 (1.3)           | 2 (6.5)   | 3 (22.7)                          | 2 (3.4)   |
| Mass or growth (Reducible)    | 0 (0)          | 0 (0)    | 0 (0)         | 0 (0)    | 0 (0)             | 2 (1.8)   | 1 (15)                            | 2 (10.4)  |
| Deformity congenital          | 4 (29.5)       | 4 (14)   | 1 (20.4)      | 4 (22.4) | 0 (0)             | 4 (5.6)   | 2 (9.1)                           | 6 (16.3)  |
| Deformity acquired            | 0 0            | 3 (10.8) | 0 (0)         | 1 (4.6)  | 0 (0)             | 0 (0)     | 1 (2.4)                           | 3 (12.1)  |
| Foreign body                  | 2 (6.2)        | 5 (17.7) | 0 (0)         | 0 (0)    | 0 (0)             | 1 (1.4)   | 0 (0)                             | 0 (0)     |
| Cardiac (Congenital)          | 3 (16.4)       | 4 (14.1) | 0 (0)         | 0 (0)    | 1 (2.6)           | 2 (3.2)   | N/A                               | N/A       |
| Abdominal distention or pain  | N/A            | N/A      | N/A           | N/A      | 10 (33.2)         | 16 (21.1) | N/A                               | N/A       |
| Inability to urinate          | N/A            | N/A      | N/A           | N/A      | 10 (25.7)         | 27 (34)   | 0 (0)                             | 0 (0)     |
| Renal stone                   | N/A            | N/A      | N/A           | N/A      | 2 (11.2)          | 2 (1.6)   | 0 (0)                             | 0 (0)     |
| Bleeding (Per Rectum)         | N/A            | N/A      | N/A           | N/A      | 1 (3.1)           | 7 (7.5)   | 2 (10.3)                          | 3 (11.8)  |
| Bleeding (Per Penis)          | N/A            | N/A      | N/A           | N/A      | N/A               | N/A       | 1 (15)                            | 2 (5.3)   |

230 (The percentages in the table below are a result of a weighted analysis)

231 *Extremities*

232 Out of the total 202 conditions identified on the upper limb, proximally to distally; 11.9% were on

233 the upper arm, 36.1% on the lower arm, and 39.6% on the thumb/hand, and fingers. Majority

234 conditions, in both rural and urban areas were secondary to trauma. Falls were noted as the most  
 235 common cause of injury in the upper arm, lower arm, and hand. Of the 156 pictures taken of the  
 236 upper limb conditions, post-burn severe depigmentation (n = 12) and lacerations/big scars (n = 12)  
 237 were identified as common surgical conditions.

238 Out of the 219 surgical conditions noted on the lower limbs proximally to distally, 10.6% were on  
 239 upper leg, 33.3% on lower leg, and 55.7% on feet and lesions were mostly due to trauma. A total  
 240 of 170 pictures of the lower extremities noted lacerations and scars (n = 16) as the most common  
 241 conditions requiring surgical review. A high percentage (26.5% in rural and 28.1 % in urban) of  
 242 population did not access surgical care for their upper and lower limb (extremities) lesions. (**Table**  
 243 **2c**).

244

245

**Table 2c: Lesions on extremities**

| Region                           | Fingers<br>(n = 32) |              | Thumb/Hand<br>(n = 48) |              | Upper arm<br>(n = 49) |              | Lower arm<br>(n = 73) |              | Upper leg<br>(n = 24) |             | Lower leg<br>(n = 73) |              | Foot<br>(n = 122)  |              |
|----------------------------------|---------------------|--------------|------------------------|--------------|-----------------------|--------------|-----------------------|--------------|-----------------------|-------------|-----------------------|--------------|--------------------|--------------|
|                                  | Urban               | Rural        | Urban                  | Rural        | Urban                 | Rural        | Urban                 | Rural        | Urban                 | Rural       | Urban                 | Rural        | Urban              | Rural        |
| <b>Surgical problem</b>          | <b>Lesions (%)</b>  |              | <b>Lesions (%)</b>     |              | <b>Lesions (%)</b>    |              | <b>Lesions (%)</b>    |              | <b>Lesions (%)</b>    |             | <b>Lesions (%)</b>    |              | <b>Lesions (%)</b> |              |
| Wound<br>(Secondary to accident) | 5<br>(70.5)         | 17<br>(69.9) | 6<br>(29.5)            | 11<br>(30.5) | 4<br>(25.7)           | 18<br>(45.7) | 10<br>(73.7)          | 34<br>(54.2) | 2<br>(42.4)           | 6 (26)      | 11<br>(48.5)          | 21<br>(42.3) | 17<br>(48.1)       | 40<br>(41.8) |
| Wound<br>(Other)                 | 0 (0)               | 2<br>(10.7)  | 1 (6.1)                | 8<br>(25.7)  | 0 (0)                 | 12<br>(39.5) | 0 (0)                 | 11<br>(22.6) | 1<br>(21.1)           | 3<br>(13.3) | 2<br>(10.2)           | 12<br>(26.6) | 3 (8)              | 19<br>(23.4) |
| Burn                             | 0 (0)               | 1<br>(1.9)   | 2<br>(19.4)            | 6<br>(19.7)  | 1<br>(13.9)           | 2<br>(3.9)   | 1 (5)                 | 2<br>(2.9)   | 2<br>(36.5)           | 2<br>(14.4) | 8<br>(21.2)           | 3<br>(6.6)   | 5<br>(15.3)        | 12<br>(15.2) |
| Mass or<br>growth<br>(Solid)     | 0 (0)               | 0 (0)        | 2 (8.4)                | 0 (0)        | 0 (0)                 | 1 (3)        | 1 (4.3)               | 1<br>(3.6)   | 0 (0)                 | 1 (3)       | 0 (0)                 | 0 (0)        | 0 (0)              | 0 (0)        |
| Deformity<br>congenital          | 0 (0)               | 2<br>(9.4)   | 2<br>(22.5)            | 1 (5.8)      | 0 (0)                 | 0 (0)        | 1 (7.1)               | 1<br>(1.7)   | 0 (0)                 | 2<br>(12.1) | 0 (0)                 | 3<br>(4.5)   | 2 (5.4)            | 10<br>(12.1) |

|                                |             |            |             |             |             |            |         |        |       |             |             |             |             |            |
|--------------------------------|-------------|------------|-------------|-------------|-------------|------------|---------|--------|-------|-------------|-------------|-------------|-------------|------------|
| Deformity acquired             | 3<br>(29.5) | 2<br>(8.1) | 1<br>(14.2) | 6<br>(13.8) | 8<br>(60.4) | 3<br>(7.8) | 2 (9.9) | 9 (15) | 0 (0) | 4<br>(23.8) | 4<br>(20.1) | 6<br>(10.1) | 4<br>(18.7) | 8<br>(7.7) |
| Recurrent drainage / discharge | 0 (0)       | 0 (0)      | 0 (0)       | 2 (4.6)     | 0 (0)       | 0 (0)      | 0 (0)   | 0 (0)  | 0 (0) | 1<br>(7.4)  | 0 (0)       | 3<br>(10.1) | 2 (4.4)     | 0 (0)      |

246 (The percentages in the table below are a result of a weighted analysis)

247

## 248 Health Seeking Behavior

249 Approximately 86.8% of surgical conditions in urban, and 86.3% in rural areas were managed at  
 250 a health care facility, ranging from private, government, and NGO-based health facilities. The  
 251 remaining 13.7% surgical conditions in rural and 13.2% in urban areas received no surgical care,  
 252 or were managed by a traditional healer. A small fraction of surgical conditions identified received  
 253 only medical management despite visiting a health care facility (4.7% in rural areas and 3.5% in  
 254 urban areas).

255 The main reasons identified for not seeking surgical care included the caregiver's perception of  
 256 the condition being non-surgical [rural areas (48.5%), and urban areas (55.4%)], followed by an  
 257 inability to afford health care. Approximately 33.6% patients and their families in rural areas could  
 258 not afford health services, which was 8.9% higher than the patient population in urban areas.

259 (Table 3).

260

261

262

263

264

265

266

267

268

**Table 3: Lesion management and impact**

|                                                                                       |                                                                             | By area of residence                         |             | By Income status |             |            |
|---------------------------------------------------------------------------------------|-----------------------------------------------------------------------------|----------------------------------------------|-------------|------------------|-------------|------------|
|                                                                                       |                                                                             | Rural                                        | Urban       | Low-income       | High-income |            |
| Total number of children with surgical conditions                                     |                                                                             | 585                                          | 350         | 435              | 500         |            |
| Total number of surgical conditions                                                   |                                                                             | 602 (100%)                                   | 312 (100%)  | 451 (100%)       | 463 (100%)  |            |
| Lesion managed at Health care facility                                                | Managed at Health facility                                                  | 492 (82.0%)                                  | 267 (83.5%) | 367 (81.1%)      | 392 (83.9%) |            |
|                                                                                       | No                                                                          | 110 (18.0%)                                  | 45 (16.5%)  | 84 (18.9%)       | 71 (16.1%)  |            |
|                                                                                       | Reasons for not visiting health facility                                    | No money for health care                     | 39 (28.9%)  | 15 (30.1%)       | 40 (39.2%)  | 14 (18.2%) |
|                                                                                       |                                                                             | No money for transportation                  | 3 (2.2%)    | 0 (0.0%)         | 3 (3.0%)    | 0 (0.0%)   |
|                                                                                       |                                                                             | No time (Died before arrangements)           | 4 (3.8%)    | 1 (4.1%)         | 2 (2.8%)    | 3 (5.1%)   |
|                                                                                       |                                                                             | Fear / No trust                              | 5 (4.1%)    | 3 (3.3%)         | 2 (2.0%)    | 6 (6.0%)   |
|                                                                                       |                                                                             | Not available (Facility/personnel/equipment) | 7 (4.4%)    | 3 (4.6%)         | 4 (3.0%)    | 6 (6.1%)   |
|                                                                                       |                                                                             | No need (Condition is not surgical)          | 61 (54.5%)  | 25 (52.0%)       | 36 (45.8%)  | 50 (62.6%) |
| Other                                                                                 | 3 (2.3%)                                                                    | 2 (5.5%)                                     | 3 (4.3%)    | 2 (2.1%)         |             |            |
| Where were these conditions managed?                                                  | At home                                                                     | 33 (6.2%)                                    | 7 (2.5%)    | 16 (4.1%)        | 24 (5.8%)   |            |
|                                                                                       | Government health facility                                                  | 214 (45.6%)                                  | 119 (43.9%) | 170 (47.4%)      | 163 (42.7%) |            |
|                                                                                       | Private health facility                                                     | 190 (38.3%)                                  | 118 (45.7%) | 135 (37.4%)      | 173 (43.9%) |            |
|                                                                                       | NGO health facility                                                         | 3 (1.4%)                                     | 2 (0.9%)    | 4 (2.0%)         | 1 (0.4%)    |            |
|                                                                                       | Hakeem/Traditional Healer                                                   | 52 (8.6%)                                    | 21 (6.9%)   | 42 (9.0%)        | 31 (7.2%)   |            |
| Type of treatment received for surgical conditions                                    | None/No surgical care                                                       | 12 (2.7%)                                    | 4 (1.3%)    | 6 (1.9%)         | 10 (2.6%)   |            |
|                                                                                       | Only medical treatment                                                      | 251 (53.2%)                                  | 125 (50.1%) | 187 (53.5%)      | 189 (51.3%) |            |
|                                                                                       | Major procedure (A procedure which requires regional or general anesthesia) | 22 (4.8%)                                    | 18 (6.7%)   | 16 (4.3%)        | 24 (6.5%)   |            |
|                                                                                       | Minor procedure (Dressings, wound care, punctures, suturing and I&D)        | 153 (28.9%)                                  | 93 (31.1%)  | 114 (29.0%)      | 132 (30.2%) |            |
|                                                                                       | Manipulation / casting / sling                                              | 43 (8.4%)                                    | 25 (9.8%)   | 36 (9.7%)        | 32 (8.0%)   |            |
|                                                                                       | Traction                                                                    | 11 (2.0%)                                    | 2 (0.7%)    | 8 (1.7%)         | 5 (1.5%)    |            |
| Does this problem (Disability) still impact on child's daily life (Multiple response) | The condition is not disabling                                              | 530 (87.4%)                                  | 276 (88.7%) | 395 (87.7%)      | 411 (88.0%) |            |
|                                                                                       | He/she feels ashamed                                                        | 39 (6.6%)                                    | 13 (3.3%)   | 31 (7.0%)        | 21 (4.0%)   |            |
|                                                                                       | He/she not able to work like he/she used to                                 | 21 (3.5%)                                    | 11 (3.5%)   | 14 (2.9%)        | 18 (4.1%)   |            |
|                                                                                       | He/she needs help with transportation                                       | 24 (4.0%)                                    | 7 (2.3%)    | 20 (4.4%)        | 11 (2.6%)   |            |
|                                                                                       | He/she needs help with daily living                                         | 21 (4.2%)                                    | 15 (5.4%)   | 16 (4.1%)        | 20 (5.0%)   |            |

269

270 Comparison of the type of surgical injuries and regions of the body affected was done between

271 children who attended school and those who did not attend school. We found that children who

272 did not attend school were more likely to have surgical wounds as a result of falls (P-value 0.02)

273 and there was no statistically significant difference in the region of the body affected between  
 274 school going and non-school going children, more details in **Table 4**.  
 275 A comparison was done between children belonging to low and high income socioeconomic  
 276 groups for the type of wounds which required surgical care, and the region of the body affected.  
 277 Children belonging to low socioeconomic groups were found to be affected more by traumatic  
 278 wounds secondary to stab/slash/cut/crush (P-value 0.00), bite or animal attacks (P-value 0.02) and  
 279 falls (P-value 0.02). The face (P-value 0.04) was the most affected region, more details in **Table**  
 280 **4**.

281 **Table 4: Subgroup analysis according to school attendance and socioeconomic status**

| Surgical problem type                | Children attending school (%) |              |       |         | Socioeconomic status (%) |                 |       |         |
|--------------------------------------|-------------------------------|--------------|-------|---------|--------------------------|-----------------|-------|---------|
|                                      | Yes (n = 4632)                | No (n = 945) | Total | P-value | Low (n = 3358)           | High (n = 4668) | Total | P-value |
| <b>Injury/accident-related wound</b> |                               |              |       |         |                          |                 |       |         |
| I. Car, truck, bus crash             | 0.036                         | 0            | 0.03  | 0.55    | 0.047                    | 0.015           | 0.028 | 0.32    |
| II. Motorcycle crash                 | 1.06                          | 0.62         | 0.99  | 0.27    | 0.99                     | 0.79            | 0.88  | 0.37    |
| III. Pedestrian, bicycle crash       | 0.15                          | 0            | 0.12  | 0.30    | 0.14                     | 0.1             | 0.12  | 0.65    |
| IV. Gunshot/firearm                  | 0.033                         | 0            | 0.028 | 0.66    | 0.046                    | 0.014           | 0.027 | 0.36    |
| V. Stab/slash/cut/crush              | 0.88                          | 1.16         | 0.92  | 0.45    | 1.2                      | 0.48            | 0.78  | 0.00*   |
| VI. Bite or animal attack            | 0.26                          | 0.052        | 0.22  | 0.09    | 0.44                     | 0.17            | 0.28  | 0.02*   |
| VII. Fall                            | 3.17                          | 5.06         | 3.48  | 0.02*   | 4.08                     | 2.9             | 3.39  | 0.02*   |
| VIII. Open fire/explosion            | 0.14                          | 0.062        | 0.13  | 0.45    | 0.082                    | 0.15            | 0.12  | 0.41    |
| IX. Hot liquid / hot object          | 0.24                          | 0.17         | 0.23  | 0.66    | 0.25                     | 0.18            | 0.21  | 0.51    |
| <b>Region of surgical problem</b>    |                               |              |       |         |                          |                 |       |         |
| Head                                 | 2.56                          | 2.85         | 2.6   | 0.63    | 2.96                     | 2.44            | 2.66  | 0.27    |
| Eyes                                 | 2.87                          | 2.36         | 2.78  | 0.48    | 2.47                     | 2.72            | 2.61  | 0.53    |
| Ears                                 | 2.1                           | 2.72         | 2.2   | 0.26    | 2.61                     | 1.81            | 2.15  | 0.06    |
| Face                                 | 2.96                          | 3.47         | 3.05  | 0.43    | 3.46                     | 2.41            | 2.84  | 0.04*   |
| Neck                                 | 0.66                          | 0.53         | 0.64  | 0.65    | 0.54                     | 0.53            | 0.54  | 0.93    |
| Chest                                | 0.67                          | 0.71         | 0.68  | 0.91    | 0.65                     | 0.72            | 0.69  | 0.74    |
| Back                                 | 0.38                          | 0.51         | 0.4   | 0.57    | 0.34                     | 0.33            | 0.34  | 0.94    |
| Abdomen                              | 1.35                          | 1.85         | 1.43  | 0.25    | 1.4                      | 1.43            | 1.42  | 0.91    |
| Buttocks/Groin/Genitalia             | 0.58                          | 0.97         | 0.65  | 0.18    | 0.68                     | 0.59            | 0.63  | 0.65    |
| Extremities                          | 0.022                         | 0            | 0.019 | 0.64    | 0.016                    | 0.02            | 0.013 | 0.34    |

282

283



284  
285  
286  
287  
288  
289  
290  
291  
292  
293  
294  
295  
296  
297  
298  
299  
300  
301  
302  
303  
304  
305  
306  
307

## **Discussion**

This large-scale survey identifies common surgical conditions and the care received in children between the ages of 5-10 years, in the two most densely populated provinces of Pakistan. It is a crucial step in understanding the surgical disease burden, and helps note the nature, site distribution and severity of the conditions, along with variance by urban and rural divide and socio-economic status in Pakistan.

The survey highlights a high surgical burden, with a similar distribution across both urban and rural areas of Pakistan. The highest number of surgical conditions were found on the head and neck region (57.7%) while the back region accounted for the least number of surgical conditions (1.7%). The survey identified a high percentage of surgical conditions for which children did not receive any surgical care. Calculated as an average of urban (13.2%) and rural (13.7%), this amounted to a staggering 13.5%. Across both rural and urban areas, the extremities were identified to have the highest percentage of surgical conditions for which care was not received (26.5% and 28.1% respectively) due to multiple reasons. Of the caregivers who did not seek healthcare services for their child's lesion, approximately half believed that the condition did not require surgical attention. This is high in comparison to a recent smaller scale study in a rural district of Pakistan, where the unmet operative need was calculated as 14.3% [11]. This study conducted at a larger scale highlights a similar pattern of high pediatric surgical disease burden in Pakistan. In

308 comparison to other South Asian countries including Nepal (unmet surgical need of 5%) [21] and  
309 our neighboring country India (unmet surgical need of 6.5%) [22] the surgical lesions having not  
310 received appropriate care in Pakistan is more than double (13.5%), pointing towards the urgent  
311 need for attention by policy makers. Pakistan faces a higher current unmet operative need, even  
312 with a greater proportion of doctors (1.1 per 1000 people) when compared to India (0.7 per 1000  
313 people) [23]. This brings to notice the need for improvement measures in resource allocation,  
314 capacity building, community engagement and policy development to improve surgical care access  
315 in especially the rural areas of Pakistan.

316 This study provides evidence that majority of the surgical conditions noted affect the head, face  
317 and neck region of children, which not only requires timely surgical treatment but also needs to be  
318 followed up for post-trauma psychosocial effects [24]. Community programs, similar to existing  
319 programs for communicable diseases like diarrhea and pneumonia, are required [25]. However,  
320 work needs to be done in expansion and incorporation of surgical disease awareness, to increase  
321 the local population's knowledge of common operative conditions and promote capacity building  
322 of health facilities at the district level. It is vital to spread a better understanding of the various  
323 types of surgical conditions and when to seek timely care, in order to reduce the associated  
324 morbidity and mortality in children. In an effort to prevent possibly disabling problems in children,  
325 awareness and training campaigns on preventative strategies for common causes of injuries like  
326 burns, falls and electrocution should be undertaken. Policies for health care subsidies are required  
327 in rural areas where most families are unable to afford health care for their children, especially as  
328 this study highlighted the inability to afford health care services as the second most common reason  
329 for not seeking care. Additionally, a large percentage of surgical conditions were secondary to  
330 trauma, so investing in lay-person training [26] for pre-hospital basic and preventive care can help

331 reduce the burden on local health care facilities and can also provide the critical extra time needed  
332 for transportation of patients to hospitals.

333 Efforts towards establishing a link between tertiary care centers and local health facilities can assist  
334 in efficient resource allocation with respect to the patient population visiting those centers. Along  
335 with this, effective patient referral systems need to be set up for surgical cases to be transferred  
336 from one center to another for further care after stabilization. Follow-up visits may be set up  
337 through calls to avoid transportation costs, which can lead to a reduction in the number of patients  
338 lost to follow up, and an improvement in patient monitoring. Implementation of trauma care  
339 guidelines [27] can help streamline the process of health care delivery, in effect assisting  
340 emergency staff in making quicker decisions leading to effective surgical care delivery. Regular  
341 assessments of resources and trained personnel, and intercommunication systems between local  
342 community hospitals may allow for efficient and timely redistribution of limited resources as per  
343 need and in an efficient manner.

344 Potential limitations of this study include the sample size possibly not representing the overall  
345 national picture of surgical burden; however, it does offer significant representation of any rural  
346 and urban setting in Sindh and Punjab. Another limitation is the survey's in-built definition of  
347 surgical conditions, as the count of operative conditions in this survey relied upon caregiver's  
348 report of the condition in a verbal interview. Hence, the numbers identified via this survey serve  
349 as proxies in estimating the burden of surgical conditions. The survey also does not directly take  
350 into account chronic diseases such as visceral malignancies, which could require surgical care,  
351 thus underestimating the true surgical burden of disease. Despite these limitations, operative  
352 conditions recognized by the SOSAS survey provides an estimate for the urgent need to improve  
353 surgical consultations and care in Pakistan.

354 **Conclusion**

355 The common surgical conditions and the associated high percentage of lesions not receiving  
356 appropriate surgical care requires attention of government policy makers. Our results have outlined  
357 the urgent need for organizing all entities (governmental, non-governmental and private) involved  
358 in pediatric surgical care delivery in both urban and rural areas. Policies at the federal, provincial  
359 and district government level are required for the efficient allocation of budget, and skilled  
360 personal (doctors and nurses) with respect to disease burden. Additionally, awareness programs  
361 on surgical diseases and urgent care should be planned, implemented, and assessed for  
362 effectiveness at the community level.

363 **Funding source**

364 This study was funded by the SCANS Consortium. The funding organization had no influence in  
365 conducting the study.

366 **Manuscript tables:**

367 Table 1: Details of children with lesions

368 Table 2a: Lesions on head and neck

369 Table 2b: Lesions on chest, back, abdomen, buttocks/groin/genitalia

370 Table 2c: Lesions on extremities

371 Table 3: Lesion management and impact

372 Table 4: Subgroup analysis according to school attendance and socioeconomic status

373 S1 Table: Diagnoses of photographs taken at the study site

374 Table A in S1 text head

375 Table B in S1 text eyes

376 Table C in S1 text ears

377 Table D in S1 text face

378 Table E in S1 text neck

379 Table F in S1 text chest

380 Table G in S1 text back

381 Table H in S1 text abdomen

382 Table I in S1 text buttocks/groin/genitalia

383 Table J in S1 text extremities

## 384 **References**

- 385 1. Shrime MG, Bickler SW, Alkire BC, Mock CJTLGH. Global burden of surgical disease: an  
386 estimation from the provider perspective. 2015;3:S8-S9.
- 387 2. Meara JG, Leather AJ, Hagander L, Alkire BC, Alonso N, Ameh EA, et al. Global Surgery 2030:  
388 evidence and solutions for achieving health, welfare, and economic development. The lancet.  
389 2015;386(9993):569-624.
- 390 3. Alkire BC, Raykar NP, Shrime MG, Weiser TG, Bickler SW, Rose JA, et al. Global access to surgical  
391 care: a modelling study. The Lancet Global Health. 2015;3(6):e316-e23.
- 392 4. Bearden A, Fuller AT, Butler EK, Tran T, Makumbi F, Luboga S, et al. Rural and urban differences  
393 in treatment status among children with surgical conditions in Uganda. 2018;13(11):e0205132.
- 394 5. Ozgediz D, Poenaru D. The burden of pediatric surgical conditions in low and middle income  
395 countries: a call to action. Journal of pediatric surgery. 2012;47(12):2305-11.
- 396 6. Nations U. The Millennium Development Goals Report 2015. New York, USA. 2015. 2016.
- 397 7. Canfin P, Eide EB, Natalegawa M, Ndiaye M, Nkoana-Mashabane M, Patriota A, et al. Our  
398 common vision for the positioning and role of health to advance the UN development agenda beyond  
399 2015. Lancet (London, England). 2013;381(9881):1885-6.
- 400 8. Lalchandani P, Dunn JC. Global comparison of pediatric surgery workforce and training. Journal  
401 of pediatric surgery. 2015;50(7):1180-3.
- 402 9. Price R, Makasa E, Hollands M. World Health Assembly Resolution WHA68.15: "Strengthening  
403 Emergency and Essential Surgical Care and Anesthesia as a Component of Universal Health Coverage"—  
404 Addressing the Public Health Gaps Arising from Lack of Safe, Affordable and Accessible Surgical and  
405 Anesthetic Services. World J Surg. 2015;39(9):2115-25.
- 406 10. Peltzer K. Injury and social determinants among in-school adolescents in six African countries.  
407 Injury Prevention. 2008;14(6):381-8.
- 408 11. Qazi SH, Meerza SSA, Groen RS, Dogar SA, Mirani M, Jamali MK, et al. Assessment of pediatric  
409 surgical needs, health-seeking behaviors, and health systems in a rural district of Pakistan.  
410 2022;2(12):e0000810.
- 411 12. Bank W. Population, total -Pakistan 2022 [Available from:  
412 <https://data.worldbank.org/indicator/SP.POP.TOTL?locations=PK>.
- 413 13. Sibieta L. 2020 Annual report on. The Institute for Fiscal Studies. 2020.
- 414 14. Blanchard R, Blanchard M, Toussignant P, Ahmed M, Smythe CM. The epidemiology and  
415 spectrum of surgical care in district hospitals of Pakistan. American journal of public health.  
416 1987;77(11):1439-45.
- 417 15. Talati JJ, Syed NA. Surgical training programs in Pakistan. World journal of surgery.  
418 2008;32(10):2156-61.
- 419 16. Population Profile Punjab [Available from: [https://pwd.punjab.gov.pk/population\\_profile](https://pwd.punjab.gov.pk/population_profile).

- 420 17. Department PW. SINDH AT A GLANCE [Available from: [https://pwd.sindh.gov.pk/Sindh-at-a-](https://pwd.sindh.gov.pk/Sindh-at-a-Glance)  
421 [Glance](https://pwd.sindh.gov.pk/Sindh-at-a-Glance).  
422 18. Petroze RT, Groen RS, Niyonkuru F, Mallory M, Ntaganda E, Joharifard S, et al. Estimating  
423 operative disease prevalence in a low-income country: results of a nationwide population survey in  
424 Rwanda. *Surgery*. 2013;153(4):457-64.  
425 19. Groen RS, Samai M, Petroze RT, Kamara TB, Yambasu SE, Calland JF, et al. Pilot testing of a  
426 population-based surgical survey tool in Sierra Leone. *World journal of surgery*. 2012;36(4):771-4.  
427 20. STAT 16 [Available from: <https://www.stata.com/>.  
428 21. Gupta S, Ranjit A, Shrestha R, Wong EG, Robinson WC, Shrestha S, et al. Surgical needs of Nepal:  
429 pilot study of population based survey in Pokhara, Nepal. 2014;38(12):3041-6.  
430 22. Cherukupalli SE, Bhatia MB, Boeck MA, Blair KJ, Nagarajan N, Gupta S, et al. SOSAS study in rural  
431 india: using accredited social health activists as enumerators. 2019;85(1).  
432 23. Bank TW. Physicians (per 1,000 people) [Available from:  
433 <https://data.worldbank.org/indicator/SH.MED.PHYS.ZS?locations=PK>.  
434 24. Walshaw EG, Taylor R, Anderson J, Sexton P, Parmar JD, Carter LMJBjoo, et al. The psychological  
435 sequelae of maxillofacial trauma: a scoping review of the literature. 2022.  
436 25. Aftab W, Piryani S, Rabbani FJHRfH. Does supportive supervision intervention improve  
437 community health worker knowledge and practices for community management of childhood diarrhea  
438 and pneumonia? Lessons for scale-up from Nigraan and Nigraan Plus trials in Pakistan. 2021;19(1):1-11.  
439 26. Callese TE, Richards CT, Shaw P, Schuetz SJ, Issa N, Paladino L, et al. Layperson trauma training in  
440 low-and middle-income countries: a review. 2014;190(1):104-10.  
441 27. Mock C. Guidelines for essential trauma care: World Health Organization; 2004.  
442
